# Supplementary material for: Modulation of Amygdala Response by Cognitive Conflict in Adolescents with Conduct Problems and Varying Levels of CU Traits
Source: Res Child Adolesc Psychopathol. 2021 Mar 16;49(8):1043–54. doi: 10.1007/s10802-021-00787-z (PMC8222043; doi:10.1007/s10802-021-00787-z)
Supplement: Supplementary file 2 — Supplementary file2 (XLSX 14 KB) [file 10802_2021_787_MOESM2_ESM.xlsx]

## Sheet: Supplementary Table 1
Supplementary Table 1
Whole brain task effects across all participants		All initially thresholded at p<.001, FWE-corrected (cluster level)
Contrast	Brain Region	L/R	Peak Voxel (mm mm mm)			k	t	z	FWE corrected p-value
Incompatible > Compatible	Inferior parietal lobule	L	-44	-32	40	304	6.43	5.45	0.009
	Middle frontal gyrus	L	-24	-4	50	196	6.1	5.23	0.049
	Posterior-medial frontal	L	-8	6	52	196	4.33	3.97
	Cerebellum	R	30	-48	-30	540	5.09	4.54	<.001
			30	-38	-32	540	4.83	4.34
			32	-44	-46	540	4.65	4.21
Compatible > Incompatible	No significant clusters
Face > Scrambled	Inferior occipital gyrus	R	44	-78	-10	2571	12.5	Inf	<.001
	Fusiform gyrus	R	42	-48	-22	2571	11.31	Inf
			30	-88	-10	2571	9.81	7.26
	Lingual gyrus	L	-34	-88	-16	2261	12.01	Inf	<.001
	Inferior occipital gyrus		-40	-84	-10	2261	10.91	7.73
	Fusiform gyrus		-42	-68	-18	2261	8.72	6.74
	Cerebelum	L	-4	-72	-22	503	5.82	5.05	0.001
			-6	-76	-36	503	5.29	4.68
	Amygdala	R	30	-2	-20	226	5.58	4.88	0.041
	Hippocampus		22	-8	-14	226	4.08	3.77
	Temporal pole		28	8	-24	226	4.08	3.77
	Precentral gyrus	R	40	4	28	295	4.33	3.97	0.016
	Inferior frontal gyrus (pars triangularis)	R	44	20	28	295	3.48	3.28
Scrambled > Face	Fusiform gyrus	R	28	-54	-10	928	7.29	5.97	<.001
			28	-32	-20	928	6.57	5.54
			28	-44	-12	928	5.93	5.12
	Fusiform gyrus	L	-28	-52	-14	783	7.19	5.91	<.001
	Hippocampus	L	-32	-26	-16	783	5.4	4.76
Fear > Calm	Lingual gyrus	R	26	-88	-6	665	5.74	4.99	<.001
			22	-78	-6	665	4.57	4.15
	Inferior occipital gyrus		42	-80	-6	665	3.52	3.3
	Inferior occipital gyrus	L	-22	-92	-6	443	5.46	4.8	0.001
Calm > fear	No significant clusters
Anger > Calm	Inferior Occipital Gyrus	L	-26	-88	-6	363	4.93	4.42	0.006
	Middle occipital gyrus	L	-26	-82	2	363	4.63	4.2
	Inferior Occipital Gyrus	R	42	-74	-10	440	4.73	4.27	0.002
			28	-90	-6	440	4.59	4.17
	Middle occipital gyrus	R	34	-88	0	440	4.32	3.95
Calm > Anger	No significant clusters
(Fear/Compatible > Calm/Compatible) > (Fear/Incompatible > Calm/Incompatible)
	Calcarine gyrus	L	-20	-66	16	478	4.35	3.98	0.001
			-12	-52	8	478	4.25	3.9
			-32	-64	18	478	4.1	3.78
No significant clusters emerged for this interaction contrast at the whole brain level for the TD group individually or for any group comparisons
Reverse interaction contrast	No significant clusters
