# Supplementary material for: Modulation of Amygdala Response by Cognitive Conflict in Adolescents with Conduct Problems and Varying Levels of CU Traits
Source: Res Child Adolesc Psychopathol. 2021 Mar 16;49(8):1043–54. doi: 10.1007/s10802-021-00787-z (PMC8222043; doi:10.1007/s10802-021-00787-z)
Supplement: Supplementary file 3 — Supplementary file3 (XLSX 10 KB) [file 10802_2021_787_MOESM3_ESM.xlsx]

## Sheet: Group comparisons
Supplementary Table 2
Whole brain task effects (group comparisons)		All initially thresholded at p<.001, uncorrected (cluster level)
Contrast	Brain Region	L/R	Peak Voxel (mm mm mm)			k	t	z	P-value (uncorrected)
Incompatible > Compatible
LCU<HCU	Inferior parietal lobule	L	-46	-32	38	205	4.94	4.43	0.006
			-34	-28	32	205	4.88	4.38
	Middle frontal gyrus	L	-28	-2	50	195	4.36	3.99	0.007
TD>LCU	Superior medial gyrus	L	0	28	44	147	4.46	4.06	0.016
	Superior medial gyrus	R	8	28	42	147	4.25	3.9
Face > Scrambled
TD>LCU	ACC	R	2	44	2	124	3.94	3.66	0.034
			14	46	4	124	3.74	3.49
Fear > Calm
TD<HCU	Precuneus	R	20	-48	14	95	5.15	4.58	0.043
Anger > Calm	No significant clusters
(Fear/Compatible > Calm/Compatible) > (Fear/Incompatible > Calm/Incompatible)
TD only	PCC	L	-8	-38	30	177	4.59	4.17	0.01
	PCC	R	10	-40	28	177	4.2	3.86
			10	-40	18	177	3.84	3.57
